# Supplementary material
Source: Springer Nature journal article supplement (https://www.springermedizin.de/resource/supplementary/12967_2005_85_MOESM1_ESM.pdf/9575652)

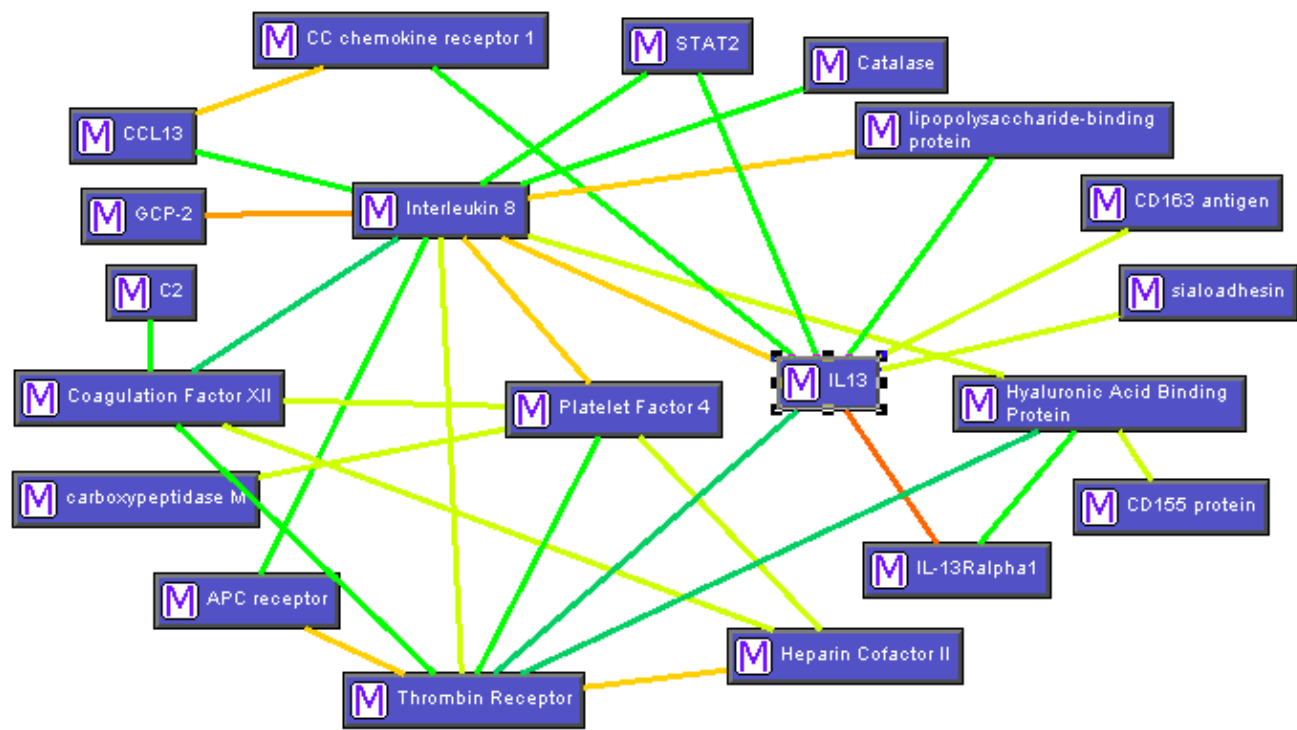

Supplement: MOESM1 [file 9575652]
